# Supplementary material for: How to Count Bugs: A Method to Estimate the Most Probable Absolute Population Density and Its Statistical Bounds from a Single Trap Catch
Source: MDPI journal article supplement (doi:10.3390/insects12100932), 2021-10-13
Supplement: s1 [file s1]

## Supplementary Material

**Supplementary files and programs** are available for download from <https://doi.org/10.7294/BE34-ZS61> (accessed on October 20, 2021)

*TrappingData.xls* (Microsoft Office 2019) contains 2 sheets: “Data table” (for entering experimental trap catch data) and “Absolute density” (for calculating most probable absolute density and its bounds associated with various trap catches).

Script *Tfer0.jsl* (JMP® Pro 16, SAS Institute, 2020) is used to estimate trap catch in the immediate proximity to a trap ( $spT_{fer}(0)$ ) by fitting the model to the available trap data points at larger distances from the trap; however, we strongly encourage empirical measurement of this important parameter.

Script “*AbsoluteDensity.jsl*” (JMP® Pro 16, SAS Institute, 2020) is used to calculate  $D_{50}$  from the experimental trapping data.

To run the scripts, all 3 files (*TrappingData.xls*, *Tfer0.jsl*, and *AbsoluteDensity.jsl*) need to be located in the same folder. Two likely usage scenarios are described below.

The units are:  $D_{50}$  and  $R_{max}$  in meters, absolute population density in number of insects per ha.

### **Step by step instructions to calculating most probable absolute population density and its 95% confidence bounds.**

Scenario 1: Insect-trap system with known parameters  $spT_{fer}(0)$ ,  $D_{50}$  and  $R_{max}$ .

1. When the parameters of the insect-trap system are known, only *TrappingData.xls* is needed, see the above link.

As an example, we will use the parameters obtained for European pine sawfly, *N. sertifer*:

$$spT_{fer}(0) = 0.09$$

$$D_{50} = 250$$

$$R_{max} = 1040$$

2. Plug these parameters in the corresponding cells in sheet “Absolute density” replacing values currently there. This will automatically update values of  $\mu$ , lower and upper bounds, and most probable catches. The graph will also automatically update to reflect these changes.

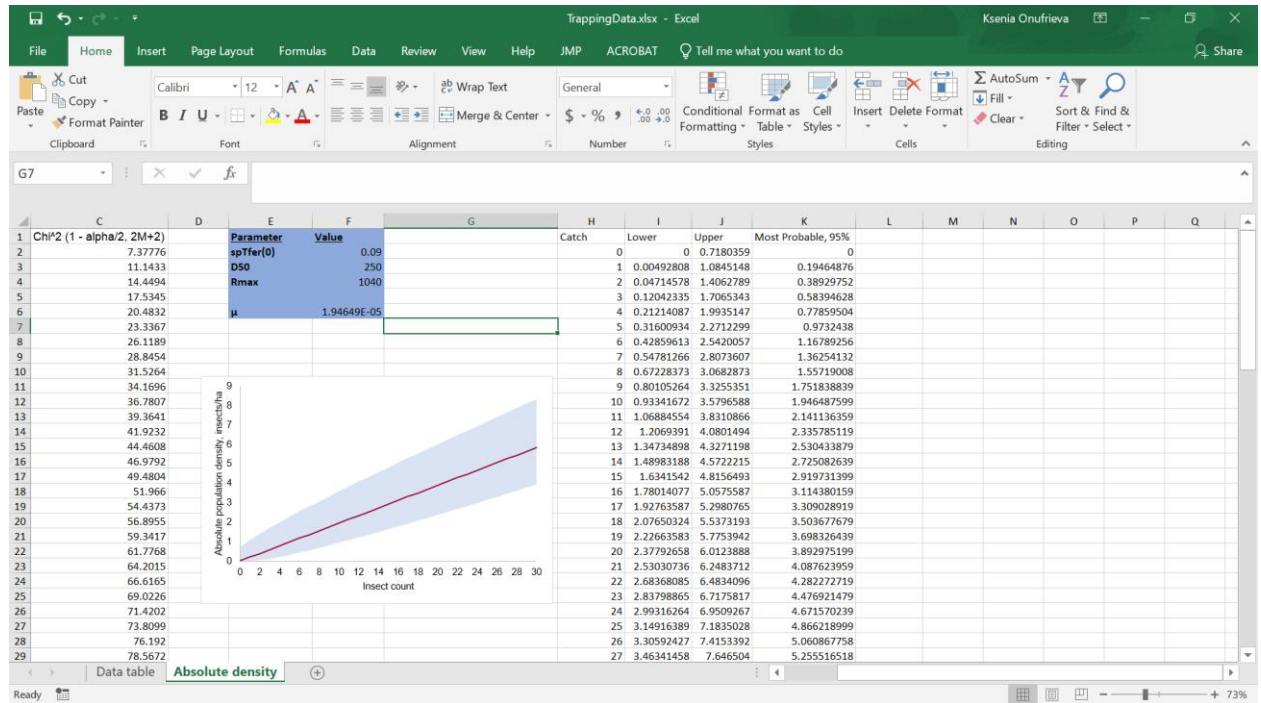

- This graph can now be used to analyze future field data. Suppose 1 insect was caught in a trap over the converged catch period for this insect. The graph and the table can be used to estimate absolute population density for the given insect – in this case 1 insect means that absolute population density ranges 0.005 – 1.08 insects/ha, most probably 0.2 insects/ha.

### Scenario 2: Insect-trap systems with unknown parameters $spT_{fer}(0)$ and/or $D_{50}$

- Conduct release-recapture experiments to estimate recapture rates at  $\geq 5$  distances, including 0 m (in the immediate proximity to the trap, which is  $spT_{fer}(0)$ ) and large distances to approximate  $R_{max}$  (smallest distance at which trap catch is 0). Catch should correspond to converged catch (minimum number of days N after which trap catch stops increasing). The same N needs to be used in the field experiments designed to sample wild populations.
- Download *TrappingData.xls* and two JMP scripts, *Tfer0.jsl* and *AbsoluteDensity.jsl*, needed to perform a fit to estimate parameters ( $spT_{fer}(0)$  and  $D_{50}$ ) from experimental data.
- Enter trap catch data in the sheet “Data table” replacing the data that are already there, do not change the column headers.
- If  $spT_{fer}(0)$  is missing and cannot be obtained empirically, it can be estimated using *Tfer0.jsl* script (JMP® Pro 15, SAS Institute, 2019), but it is not recommended.
- To conduct the analysis, please, make sure that all files are located in the same folder. As an example, we will use data that is already entered in the spreadsheet “Data table”.
- If the  $spT_{fer}(0)$  data is missing, we will estimate it using the script *Tfer0.jsl*. However, we do recommend collecting this data empirically. To estimate  $spT_{fer}(0)$  using the script:
  - Double-click the script *Tfer0.jsl*, this will open the window:

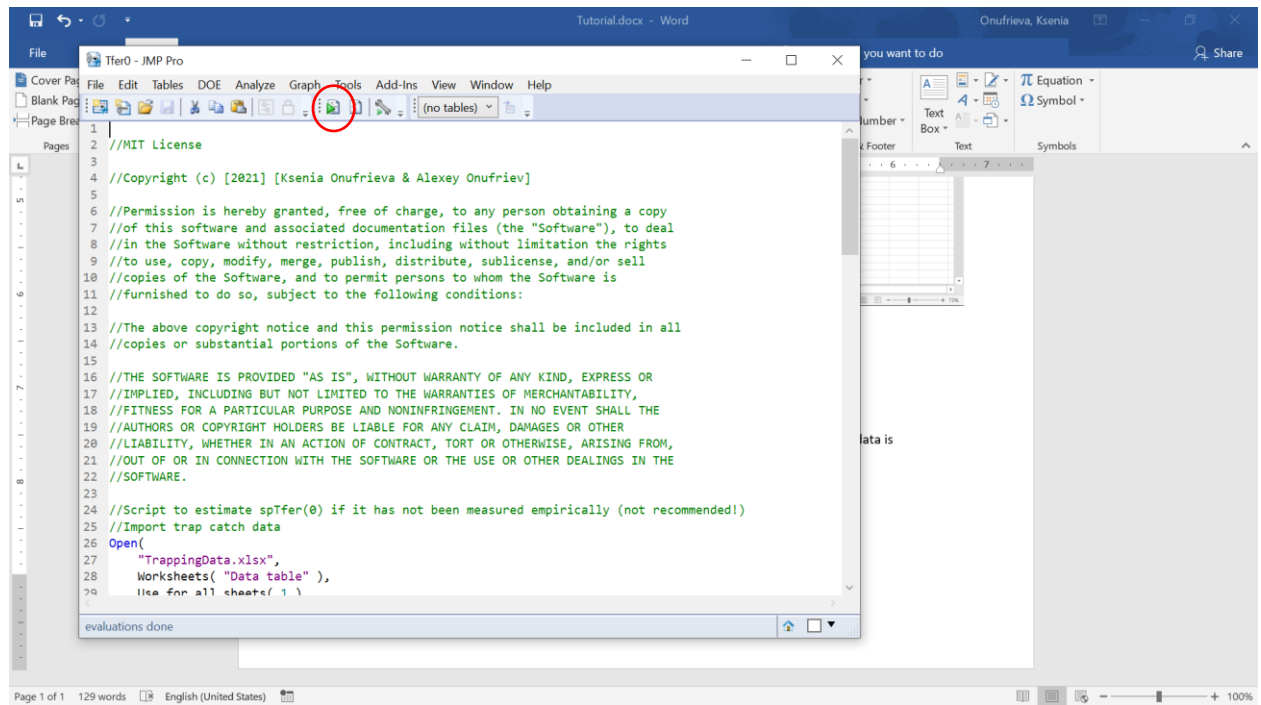

- b. Click Run Script (shown by red circle in the picture above),  $spT_{fer}(0)$  will be calculated and reported in the table below (circled in red).

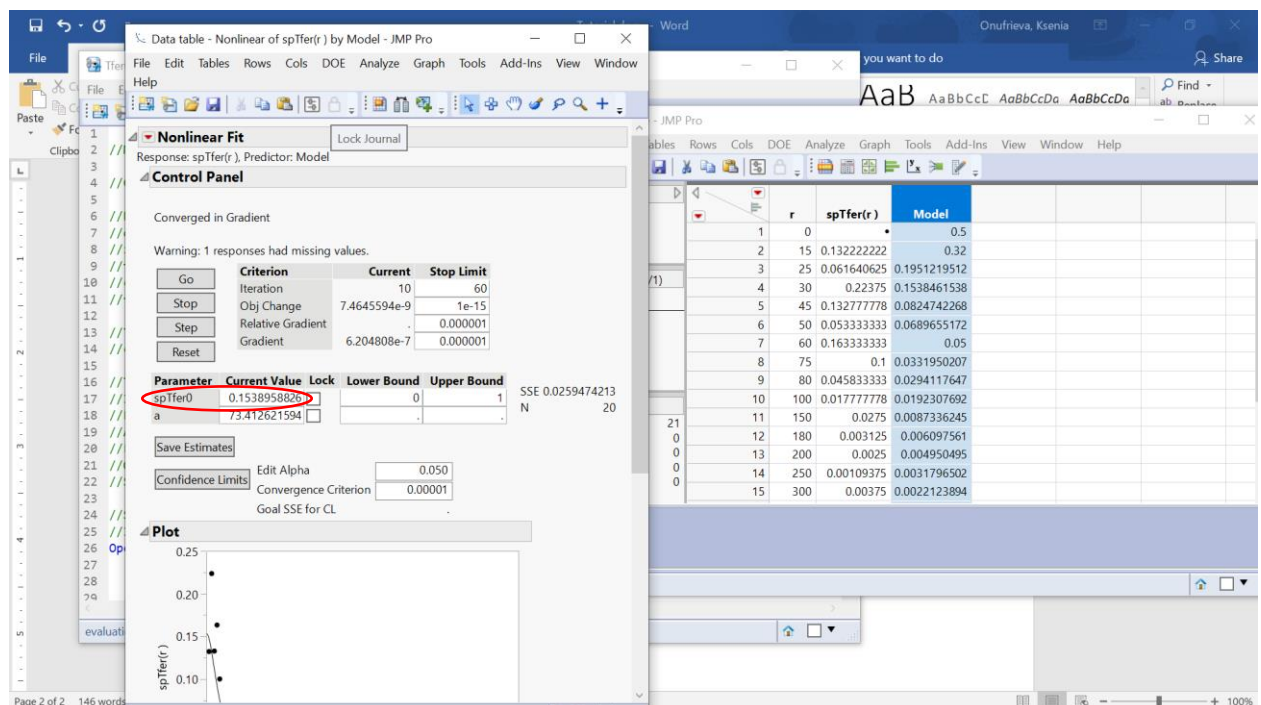

- c. Add the value of  $spT_{fer}(0)$  to the corresponding cell in sheet "Data table" of *TrappingData.xls* file. Now the data table is ready to use for estimating  $D_{50}$  from the data.

7. To estimate  $D_{50}$  by fitting Equation 3 to the log-transformed experimental data points:

a. Double-click the script AbsoluteDensity.jsl, this will open the window

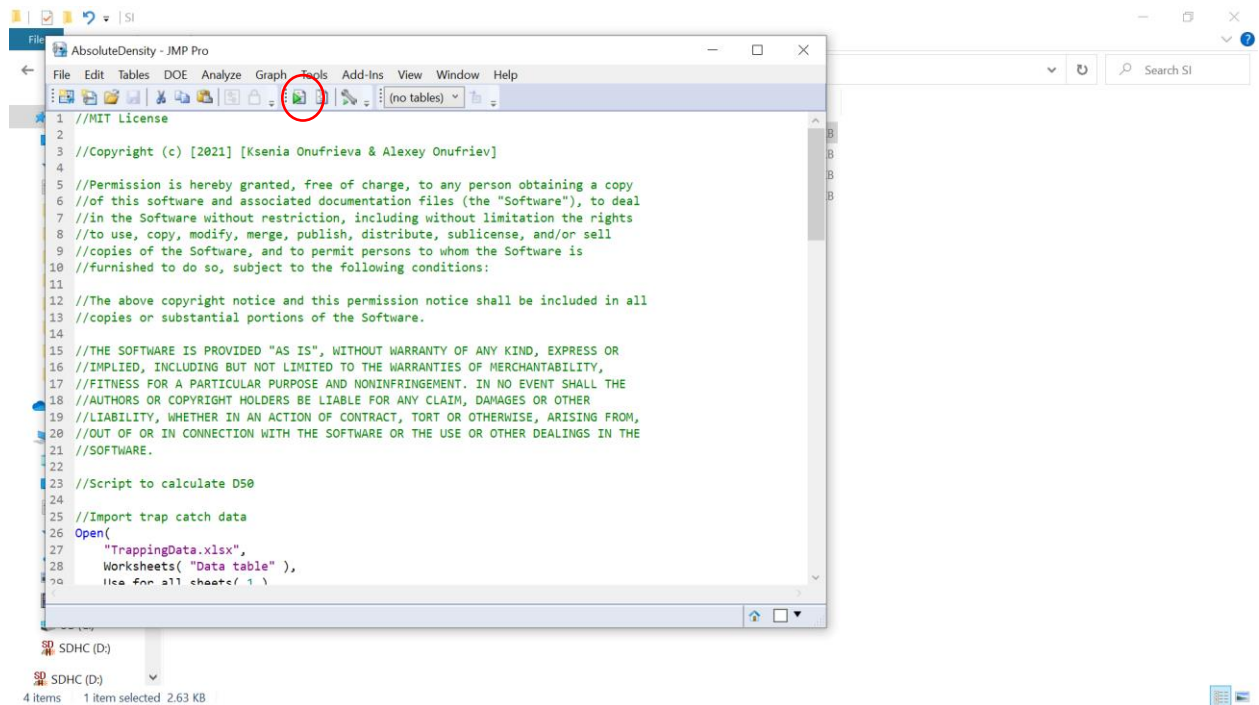

b. Click Run Script (circled in red in the figure above), this will calculate  $D_{50}$  (circled in red below)

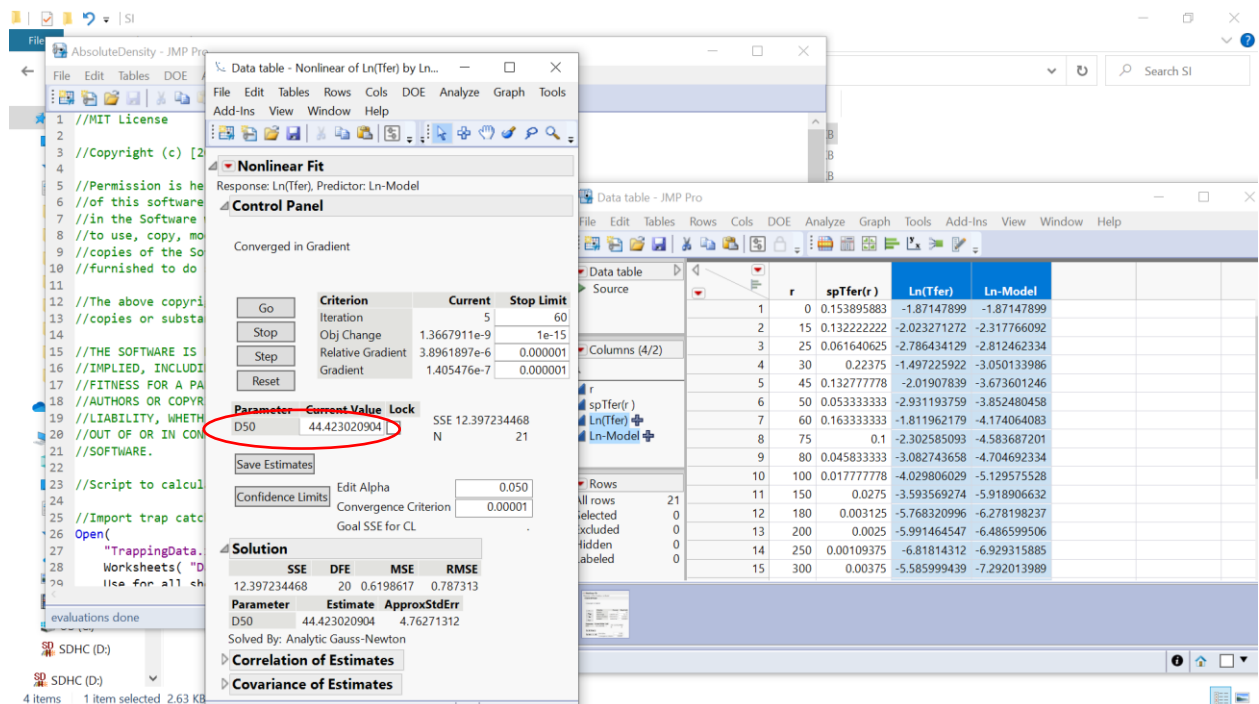

c. Plug both parameters,  $spT_{fer}(0)$  and  $D_{50}$ , in the corresponding cells in spreadsheet "Absolute density" replacing values that are currently there. This will automatically update values of  $\mu$ ,

lower and upper bounds, and most probable catches. The graph will also automatically update to reflect these changes.

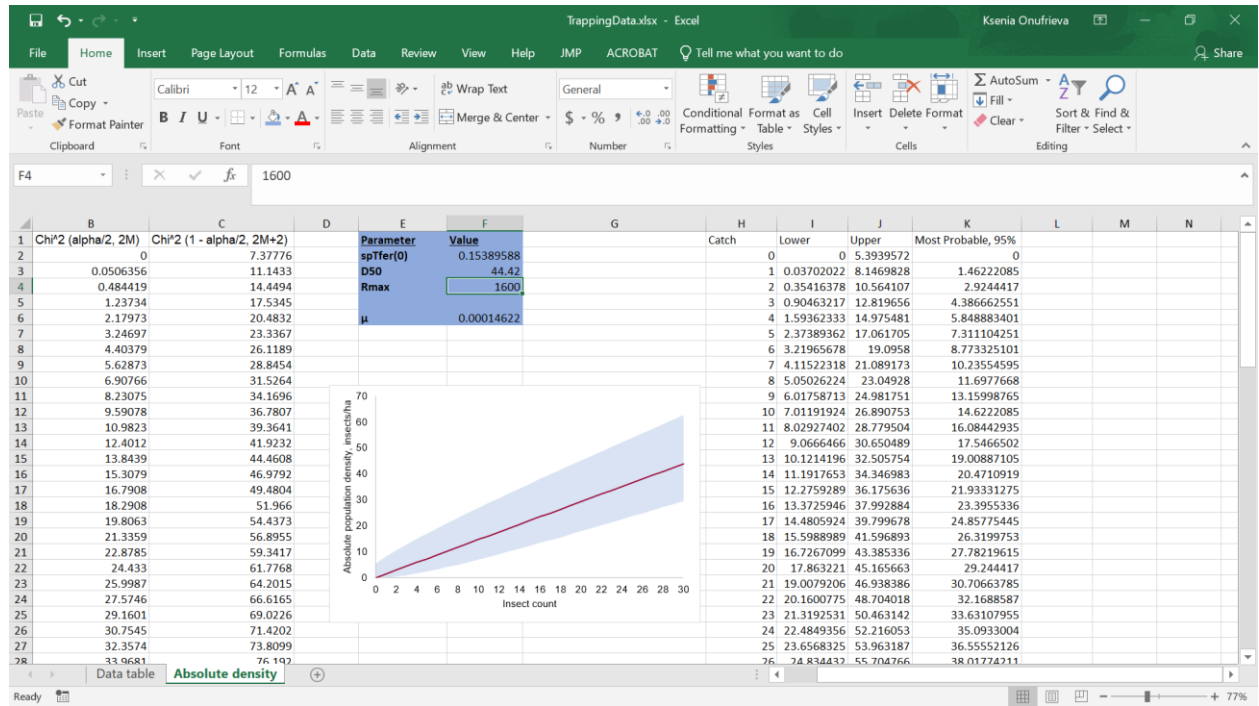

- d. The graph is now ready to be used to interpret field data. Suppose 1 insect was caught in a trap over the converged catch period for this insect. The graph and the table can be used to estimate absolute population density for the given insect – in this case 1 insect means that absolute population density ranges 0.037 – 8.15 insects/ha, most probably 1.5 insects/ha.

**Table S1.** Quantile function of the  $\chi^2$  distribution with  $n$  degrees of freedom,  $p = 0.95$ , to be used in Equation 5. Alternatively, Excel table and scripts available at <https://doi.org/10.7294/BE34-ZS61> (accessed on October 10, 2021) can be used to calculate most probable absolute population density and its statistical bounds.

| # males caught | $\chi^2 ((1 - p)/2, 2M)$ | $\chi^2 (1 - (1 - p)/2, 2M+2)$ |
|----------------|--------------------------|--------------------------------|
| 0              | 0                        | 7.37776                        |
| 1              | 0.0506356                | 11.1433                        |
| 2              | 0.484419                 | 14.4494                        |
| 3              | 1.23734                  | 17.5345                        |
| 4              | 2.17973                  | 20.4832                        |
| 5              | 3.24697                  | 23.3367                        |
| 6              | 4.40379                  | 26.1189                        |
| 7              | 5.62873                  | 28.8454                        |
| 8              | 6.90766                  | 31.5264                        |
| 9              | 8.23075                  | 34.1696                        |
| 10             | 9.59078                  | 36.7807                        |
| 11             | 10.9823                  | 39.3641                        |
| 12             | 12.4012                  | 41.9232                        |
| 13             | 13.8439                  | 44.4608                        |
| 14             | 15.3079                  | 46.9792                        |

|    |         |         |
|----|---------|---------|
| 15 | 16.7908 | 49.4804 |
| 16 | 18.2908 | 51.966  |
| 17 | 19.8063 | 54.4373 |
| 18 | 21.3359 | 56.8955 |
| 19 | 22.8785 | 59.3417 |
| 20 | 24.433  | 61.7768 |
| 21 | 25.9987 | 64.2015 |
| 22 | 27.5746 | 66.6165 |
| 23 | 29.1601 | 69.0226 |
| 24 | 30.7545 | 71.4202 |
| 25 | 32.3574 | 73.8099 |
| 26 | 33.9681 | 76.192  |
| 27 | 35.5863 | 78.5672 |
| 28 | 37.2116 | 80.9356 |
| 29 | 38.8435 | 83.2977 |
| 30 | 40.4817 | 85.6537 |

**Table S2.** Time to converged catch obtained using release-recapture experiments.

| Insect                                         | Trap type | Time to converged catch |
|------------------------------------------------|-----------|-------------------------|
| <i>L. dispar</i>                               | Pheromone | 3 days                  |
| Brown marmorated stink bug ( <i>H. halys</i> ) | Pheromone | 2 days                  |
| Erebidae assemblage                            | Light     | 10 min                  |
| Sphingidae assemblage                          | Light     | 10 min                  |
